# Supplementary material for: Disease diagnosis in primary care in Uganda
Source: BMC Fam Pract. 2014 Oct 8;15:165. doi: 10.1186/1471-2296-15-165 (PMC4288627; doi:10.1186/1471-2296-15-165)
Supplement: Supplementary file 1 — Additional file 1: Table S1: Distribution of all diagnoses made at primary care health facilities. This file has a list of all the diseases that were diagnosed during the study period. (XLSX 35 KB) [file 12875_2014_1139_MOESM1_ESM.xlsx]

## Sheet: Sup Table 1
Supplementary Table 1. Distribution of all diagnoses made at primary care health facilities
	Total	Frequency (N=209,734)	Percent
1	Malaria - not during pregnancy (now Malaria All)	101266	0.482831
	Malaria - not during pregnancy	100963	0.481386
	Malaria during pregnancy	0	0
	Malaria, nos	303	0.00144469
2	Cough or cold (no pneumonia)	40669	0.193908
3	Intestinal Worms	13892	0.0662363
4	GI Disorders - non-infective	11519	0.0549219
5	Pneumonia	8335	0.0397408
6	Skin conditions	8028	0.0382771
7	Diarrhea	8137	0.0387968
	Diarrhea - Acute	7539	0.0359455
	Diarrhea - Persistent	542	0.00258423
99	Diarrhea, Nos	56	0.000267005
8	Urinary Tract Infection	7043	0.0335806
9	Injuries Trauma	4618	0.0220184
10	Oral diseases	4832	0.0230387
11	Pelvic Inflammatory Disease	3486	0.0166211
12	ENT Conditions	3762	0.017937
13	Eye conditions	3782	0.0180324
	Indeterminate/Ineligible Diagnosis (as written on the MF5 but couldn’t be understood)	3348	0.0159631
14	STI	3340	0.0159249
15	Anaemia	1515	0.00722344
16	Cardiovascular - High BP	1437	0.00685154
17	Typhoid Fever	1390	0.00662744
18	HIV/AIDS	1275	0.00607913
19	Asthma	1095	0.0052209
20	Epilepsy	1030	0.00491098
	Arthritis	1074	0.00512077
21	Arthritis, Nos	1032	0.00492052
156	Arthritis, Septic	14	6.67512e-05
192	Arthritis, Rheumatoid	10	4.76794e-05
216	Arthritis, Pyogenic	8	3.81436e-05
244	Osteoarthritis	6	2.86077e-05
329	Arthritis, Effusion	2	9.53589e-06
403	Arthritis, Allergic	1	4.76794e-06
404	Arthritis, Bacterial	1	4.76794e-06
22	Low Back pain, Nos	988	0.00471073
23	Dysentry	915	0.00436267
24	Injuries Road	819	0.00390495
	Allergy	711	0.00339001
25	Allergy, Nos	704	0.00335663
263	Allergy, Food	3	1.43038e-05
264	Allergy, Light	2	9.53589e-06
394	Allergy, Soap	1	4.76794e-06
395	Allergy, Cold water	1	4.76794e-06
	Bronchitis	883	0.00421009
26	Bronchitis, Acute	612	0.00291798
52	Bronchitis, Nos	216	0.00102988
84	Bronchitis, Chronic	53	0.000252701
331	Bronchitis, Recurrent	2	9.53589e-06
27	Mental Illness	575	0.00274157
29	Neuropathy, Nos	560	0.00267005
30	Diabetes Mellitus	535	0.00255085
	Candidiasis	893	0.00425777
31	Candidiasis, Vaginal	563	0.00268435
42	Candidiasis, Nos	330	0.00157342
	Respiratory tract infection, other categories	527	0.00251271
32	Respiratory tract infection, acute	511	0.00243642
174	Respiratory tract infection, chronic	12	5.72153e-05
258	Respiratory tract infection, allergic	4	1.90718e-05
33	Myalgia, Nos	502	0.00239351
	Abscess	603	0.00287507
34	Abscess, Nos	446	0.0021265
67	Abscess, Breast	96	0.000457723
159	Abscess, Bartholin's	13	6.19833e-05
166	Abscess, Injection	12	5.72153e-05
205	Abscess, Parotid	9	4.29115e-05
214	Abscess, Cervical	8	3.81436e-05
227	Abscess, Anal	6	2.86077e-05
228	Abscess, Inguinal	6	2.86077e-05
281	Abscess, Muscle	3	1.43038e-05
319	Abscess, Scrotal	2	9.53589e-06
386	Abscess, Psoas	1	4.76794e-06
387	Abscess, Renal	1	4.76794e-06
35	Pain localised to other parts of the lower abdomen	415	0.0019787
	Headache	600	0.00286077
36	Headache, Nos	399	0.00190241
59	Headache, Migraine	144	0.000686584
79	Headache, Tension	57	0.000271773
37	Cardiovascular - Other	357	0.00170216
39	Non specific pain	332	0.00158296
40	Mastitis, Nos	332	0.00158296
41	Abortion	298	0.00142085
43	Abnormal Vaginal Discharge	326	0.00155435
	Malnutrition	572	0.00272726
44	Malnutrition - low weight for age	320	0.00152574
55	Malnutrition - severe	175	0.00083439
73	Malnutrition, Nos	76	0.000362364
491	Malnutrition, Moderate Acute	1	4.76794e-06
45	Animal or Snake Bite	254	0.00121106
46	Pleurisy, Nos	271	0.00129211
47	Dysmenorrhea	267	0.00127304
48	Chest pain, Nos	230	0.00109663
49	Somatic pain	185	0.00088207
50	Musculoskeletal Pain	229	0.00109186
51	Alcohol and drug abuse	192	0.000915445
	Sepsis	200	0.000953589
53	Sepsis, Nos	195	0.000929749
238	Sepsis, streptococcal	5	2.38397e-05
54	Perinatal conditions in newborns	81	0.000386203
56	Neuritis	162	0.000772407
57	Bacterial infection, Nos	156	0.000743799
	Post operative complications	259	0.0012349
60	Post operative complications, nos	130	0.000619833
189	Post operative complications, sepsis	8	3.81436e-05
61	Brucellosis	121	0.000576921
	Orchitis	135	0.000643672
62	Orchitis, Nos	129	0.000615065
364	Orchitis, recurrent	2	9.53589e-06
254	Orchitis, acute	4	1.90718e-05
63	Pregnancy disorders,Nos	114	0.000543546
	TB	275	0.00131118
64	New TB Case - No prior TB Treatment	113	0.000538778
68	Known TB Case - Med Refill	96	0.000457723
88	TB, Unknown	45	0.000214557
128	New TB Case - Previous TB Treatment	21	0.000100127
	Dehydration	159	0.000758103
65	Dehydration, Nos	111	0.000529242
93	Dehydration, Severe	47	0.000224093
339	Dehydration, Mild	1	4.76794e-06
66	Fatigue	101	0.000481562
69	Rheumatism	75	0.000357596
70	Myositis	79	0.000376668
71	Schistosomiasis	78	0.0003719
72	Acute flaccid paralysis	77	0.000367132
74	Pyrexia,Nos	79	0.000376668
75	Disorders of musculoskeletal system	68	0.00032422
	Meningitis	133	0.000634137
76	Meningitis (Meningococcal)	66	0.000314684
78	Meningitis (Non-meningococcal)	61	0.000290845
235	Meningitis, nos	6	2.86077e-05
	Adenitis/Lymphadenitis	51	0.000243165
77	Lymphadenitis	62	0.000295613
104	Adenitis, Nos	36	0.000171646
253	Lymphadenitis,inguinal	5	2.38397e-05
283	Adenitis, Cervical	2	9.53589e-06
324	Adenitis, Acute Nos	2	9.53589e-06
325	Adenitis, Axilla	2	9.53589e-06
326	Adenitis, inguinal	2	9.53589e-06
392	Adenitis, Thyroid	1	4.76794e-06
494	Mesenteric adenitis	1	4.76794e-06
	Sciatica	58	0.000276541
80	Sciatica, nos	57	0.000271773
528	Sciatica, injection	1	4.76794e-06
81	Urethral discharge	57	0.000271773
82	Oesteomyelitis,Nos	53	0.000252701
	Epididymo-orchitis	53	0.000252701
83	Epididymo-orchitis, Nos	51	0.000243165
344	Epididymo-orchitis, Acute	2	9.53589e-06
	Ulcers	58	0.000276541
85	Ulcer, Nos	52	0.000247933
548	ulcers, anaphylactic	1	4.76794e-06
549	Ulcer, breast	1	4.76794e-06
550	Ulcer, gluteal	1	4.76794e-06
551	ulcer, scrotal	1	4.76794e-06
552	ulcer, septic	1	4.76794e-06
553	Ulcers, Nos	1	4.76794e-06
86	Hydrocele	53	0.000252701
87	Insect Bite	47	0.000224093
	Arthralgia	53	0.000252701
89	Arthralgia, Nos	46	0.000219325
230	Arthralgia, Hip	6	2.86077e-05
402	Arthralgia, Neck	1	4.76794e-06
90	Pregnancy, normal	43	0.000205022
	Tetanus	41	0.000195486
226	Tetanus, Nos	9	4.29115e-05
91	Tetanus (0-28 days of age)	3	1.43038e-05
121	Tetanus over 28 days old	29	0.00013827
92	Peurperal sepsis	43	0.000205022
94	Leprosy	45	0.000214557
95	Pharyngitis, Nos	46	0.000219325
96	Filariasis	44	0.00020979
97	Measles	45	0.000214557
98	Pyomyositis	40	0.000190718
	Drug Adverse effects	63	0.00030038
100	Drug Adverse effects, Nos	42	0.000200254
229	Adverse Effects, Depoprovera	7	3.33756e-05
262	Adverse effects, ARVs	4	1.90718e-05
282	Adverse effects, Sulphur	3	1.43038e-05
320	Adverse effects, Cotrimoxazole	2	9.53589e-06
321	Adverse Effects, Family Planning	2	9.53589e-06
322	Adverse effects, Steven Johnsons Syndrome	2	9.53589e-06
389	Adverse Effects, Antiemetics	1	4.76794e-06
101	Bacteremia, Nos	42	0.000200254
102	Hypoglycemia	35	0.000166878
105	Haemorrhage during pregnancy	27	0.000128734
	Nephritis	36	0.000171646
106	Nephritis, nos	35	0.000166878
503	Nephritis, acute	1	4.76794e-06
107	Nephrotic syndrome	37	0.000176414
	Poisoning	89	0.000424347
108	Poisoning, food	31	0.000147806
112	Poisoning, Nos	28	0.000133502
148	Poisoning, organophosphate	15	7.15192e-05
212	Poisoning, Paraffin	7	3.33756e-05
369	Poisoning, chemical	2	9.53589e-06
370	Poisoning, cyanide	2	9.53589e-06
371	Poisoning, Diesel	2	9.53589e-06
521	Poisoning, Aspirin	1	4.76794e-06
522	Poisoning, Rat poisoin	1	4.76794e-06
109	Prematurity	2	9.53589e-06
110	Onchocerciasis	31	0.000147806
111	Parotitis, Nos	32	0.000152574
113	Post menopausal syndrome	32	0.000152574
114	Sickle Cell Disease	29	0.00013827
115	Menorrhagia	30	0.000143038
116	Disorders of the skeletal system	29	0.00013827
117	Hormonal Imbalance	31	0.000147806
	Amoebiasis	29	0.00013827
118	Amoebiasis	28
328	Amoeboma, Nos	1	4.76794e-06
	Hernia	45	0.000214557
119	Hernia, epigastric	26	0.000123967
170	Hernia, femoral	15	7.15192e-05
267	Hernia, incisional	4	1.90718e-05
120	Nausea and vomiting	28	0.000133502
	Cysts	61	0.000290845
122	Cysts, nos	23	0.000109663
103	Cyst, Ovarian	35	0.000166878
338	Cyst, Vaginal	2	9.53589e-06
433	Cyst, cervical	1	4.76794e-06
123	Endometritis	26	0.000123967
124	Death in OPD - No Diagnosis	21	0.000100127
126	Engorgement, breast	21	0.000100127
127	Goitre	23	0.000109663
129	Balanitis	24	0.000114431
	Prolapse	50	0.000238397
130	Prolapse, Uterus	22	0.000104895
141	Prolapse, vaginal	20	9.53589e-05
222	Prolapse, cervical	7	3.33756e-05
525	Prolapse, Nos	1	4.76794e-06
131	Arthrosis, Nos	24	0.000114431
132	Childhood mental disorder	19	9.05909e-05
	Foreign body	55	0.000262237
133	Foreign body, Nos	21	0.000100127
196	Foreign body, Ear	11	5.24474e-05
219	Foreign body, Nose	7	3.33756e-05
249	Foreign body, Gastrointestinal	4	1.90718e-05
289	Foreign body, Eye	3	1.43038e-05
290	Foreign body, Muscle	3	1.43038e-05
349	Foreign body, Scalp	2	9.53589e-06
350	Foreign body, Toe	1	4.76794e-06
455	Foreign body, Finger	1	4.76794e-06
456	Foreign body, Foot	1	4.76794e-06
457	Foreign body, Palm	1	4.76794e-06
134	Benign prostatic hyperplasia	20	9.53589e-05
	Fibroids	36	0.000171646
135	Fibroid,Nos	21	0.000100127
149	Fibroids, uterine	14	6.67512e-05
450	Fibroids, cervical	1	4.76794e-06
136	Guinea Worms	19	9.05909e-05
137	Psychosomatic Pain	20	9.53589e-05
	Cancer	69	0.000328988
138	Cancer, Nos	19	9.05909e-05
175	Cancer, Breast	12	5.72153e-05
193	Cancer, Lymphoma	9	4.29115e-05
217	Cancer, cervix	8	3.81436e-05
332	Cancer, Abdominal	2	9.53589e-06
333	Cancer, bone	2	9.53589e-06
334	Cancer, Melanoma	2	9.53589e-06
417	Cancer, Malignant Melanoma	1	4.76794e-06
418	Cancer, Osteosarcoma	1	4.76794e-06
419	Cancer, penis	1	4.76794e-06
420	Cancer, Rhabdomyoscarcoma	1	4.76794e-06
421	Cancer, Scrotal	1	4.76794e-06
422	Cancer, squamous cell	1	4.76794e-06
423	Cancer, stomach	1	4.76794e-06
424	Cancer, Urethral	1	4.76794e-06
463	Hepatic Carcinoma	1	4.76794e-06
465	Hepatoma	1	4.76794e-06
268	Karposis Sarcoma	4	1.90718e-05
514	Osteoma	1	4.76794e-06
	Cholecystitis	23	0.000109663
139	Cholecystitis	22	0.000104895
427	Cholecystitis, Acute	1	4.76794e-06
140	Herpes simplex,Nos	19	9.05909e-05
142	Renal Disease	19	9.05909e-05
143	Yellow Fever	17	8.10551e-05
144	Congenital disorder	18	8.5823e-05
145	Laryngitis,Nos	18	8.5823e-05
146	Neurosis,Nos	19	9.05909e-05
147	Palpitations, Nos	17	8.10551e-05
150	Convulsions, Nos	16	7.62871e-05
151	Dizziness	16	7.62871e-05
152	Hyperemesis Gravidarum	17	8.10551e-05
153	Shock,Nos	12	5.72153e-05
154	Spondylitis	16	7.62871e-05
	Whitlow	17	8.10551e-05
155	Whitlow,Nos	16	7.62871e-05
560	Whitlow, Arm	1	4.76794e-06
157	Salmonellosis	16	7.62871e-05
158	Sleeping Sickness	12	5.72153e-05
160	Backache, Nos	13	6.19833e-05
161	Circumcision	12	5.72153e-05
162	Cystocoele	15	7.15192e-05
	Hematoma	14	6.67512e-05
163	Hematoma, Nos	13	6.19833e-05
461	Hematoma, Cephalo	1	4.76794e-06
164	Oedema, Nos	15	7.15192e-05
	Swelling	31	0.000147806
165	Swelling, Nos	12	5.72153e-05
276	Swelling, foot	4	1.90718e-05
311	Swelling, breast	3	1.43038e-05
378	Swelling, hands	2	9.53589e-06
379	Swelling, prepuce, Nos	2	9.53589e-06
380	Swelling, scrotum,Nos	2	9.53589e-06
537	Swelling, axilla	1	4.76794e-06
538	Swelling, epigastrum, Nos	1	4.76794e-06
539	Swelling, face	1	4.76794e-06
540	Swelling, finger	1	4.76794e-06
541	Swelling, muscular,Nos	1	4.76794e-06
542	Swelling, neck,Nos	1	4.76794e-06
167	Cholera	13	6.19833e-05
168	Disorders of the Breast,Nos	14	6.67512e-05
169	Growth, Nos	13	6.19833e-05
171	Morning sickness	15	7.15192e-05
172	Osteoporosis	12	5.72153e-05
173	Post Abortion Sepsis	14	6.67512e-05
176	Hyperpyrexia	12	5.72153e-05
177	Mumps	11	5.24474e-05
178	Phimosis	13	6.19833e-05
179	Hemorrhage, Nos	10	4.76794e-05
	Infertility	28	0.000133502
180	Infertility, Nos	13	6.19833e-05
208	Infertility, Secondary	8	3.81436e-05
234	Infertility, Primary	7	3.33756e-05
181	Metrorrhagia	13	6.19833e-05
182	Polymenorrhea	11	5.24474e-05
183	Hepatosplenomegally Syndrome	11	5.24474e-05
184	Insomnia	12	5.72153e-05
185	Neuropathic pain	11	5.24474e-05
186	Osteomyelitis	9	4.29115e-05
187	Paronychia	10	4.76794e-05
188	Paraesthesia	11	5.24474e-05
190	Rabies	10	4.76794e-05
	Vagnitis	15	7.15192e-05
191	Vaginitis, Nos	10	4.76794e-05
280	Vulvovaginitis	4	1.90718e-05
558	Vaginitis, chronic	1	4.76794e-06
194	Dyspneoa, Nos	8	3.81436e-05
195	Febrile convulsion	11	5.24474e-05
197	Ganglion	11	5.24474e-05
198	Hemorrhagic Fever	10	4.76794e-05
199	Irregular menstruation, Nos	11	5.24474e-05
200	Parasitosis	8	3.81436e-05
201	Vaginal bleeding	10	4.76794e-05
	Glomerulonephritis	14	6.67512e-05
202	Glomerulonephritis, Acute	10	4.76794e-05
266	Glomerulonephritis, Nos	4	1.90718e-05
203	High BP during pregnancy	8	3.81436e-05
204	Neurogenic Shock	9	4.29115e-05
	Amenorrhea	10	4.76794e-05
206	Amenorrhea, Nos	9	4.29115e-05
397	Amenorrhea, Secondary	1	4.76794e-06
	Cervicitis	9	4.29115e-05
207	Cervicitis, Nos	7	3.33756e-05
425	Cervicitis, Infective	1	4.76794e-06
426	Cervicitis, Bacterial	1	4.76794e-06
209	Menstrual Disorders, Nos	9	4.29115e-05
210	Paraphimosis	8	3.81436e-05
211	Peurperal complications	7	3.33756e-05
213	Postherpetic Neuralgia	8	3.81436e-05
215	Adhesion, Nos	6	2.86077e-05
218	Fibrosis	8	3.81436e-05
	Lymphadenopathy	12	5.72153e-05
220	Lymphadenopathy, Nos	8	3.81436e-05
488	Lymphadenopathy, Cervical	1	4.76794e-06
489	Lymphadenopathy, Axilla	1	4.76794e-06
362	Lymphadenopathy, submandibular	2	9.53589e-06
221	Painful scar	7	3.33756e-05
223	Psoriasis	7	3.33756e-05
224	Testiculitis	7	3.33756e-05
225	Testicular Torsion	8	3.81436e-05
231	Athlete's foot	7	3.33756e-05
232	Gangrene, Nos	6	2.86077e-05
233	Hydrocephalus	7	3.33756e-05
236	Obstructive airway disease	6	2.86077e-05
237	Retained Products of conception	7	3.33756e-05
	Erectile dysfunction/abnormalities	7	3.33756e-05
239	Erectile dsyfunction	6	2.86077e-05
448	Erectile abnormalities	1	4.76794e-06
240	Loss of appetite	6	2.86077e-05
	Lumps	7	3.33756e-05
241	Lumps, breast	6	2.86077e-05
487	Lump	1	4.76794e-06
242	Neuralgia, cervical	6	2.86077e-05
243	Onychomycosis	5	2.38397e-05
245	Pre menstrual syndrome	5	2.38397e-05
246	Degenerative disorder	3	1.43038e-05
247	Dysfunctional uterine bleeding	5	2.38397e-05
248	Ectopic pregnancy	5	2.38397e-05
250	Hemoglobinuria	1	4.76794e-06
251	Hepatomegally	5	2.38397e-05
252	Incisional pain	4	1.90718e-05
255	Parkinsons Syndrome	4	1.90718e-05
256	Pertussis	3	1.43038e-05
257	Prolapsed Disk	4	1.90718e-05
259	Seizures	4	1.90718e-05
260	Synovitis	4	1.90718e-05
261	Vaginosis, bacterial	3	1.43038e-05
265	Failure to thrive	4	1.90718e-05
269	Lymphangitis	4	1.90718e-05
270	Mastalgia,Nos	4	1.90718e-05
271	Meningism	4	1.90718e-05
272	Nodding disease	4	1.90718e-05
273	Pelvic mass	4	1.90718e-05
274	Plague	2	9.53589e-06
275	Pre menopausal syndrome	4	1.90718e-05
277	Torticolis	4	1.90718e-05
	Tumor	6	2.86077e-05
278	Tumor, breast, benign	4	1.90718e-05
383	Tumor, Nos, benign	2	9.53589e-06
	Vitamin Deficiency	10	4.76794e-05
279	Vitamin B Deficiency	4	1.90718e-05
317	Vitamin A deficiency	3	1.43038e-05
318	Vitaminosis	3	1.43038e-05
284	Anaphylaxis, Nos	3	1.43038e-05
285	Bartholinitis	3	1.43038e-05
286	Chronic obstructive pulmonary disease, unspecified	2	9.53589e-06
287	Coma, Nos	2	9.53589e-06
288	Cryptochirdism	3	1.43038e-05
291	Granuloma	3	1.43038e-05
292	Haemoptysis, Nos	3	1.43038e-05
293	Hydronephrosis	2	9.53589e-06
294	Hyperthyroidism	3	1.43038e-05
295	Intertrigo	3	1.43038e-05
296	Intrauterine fetal death	2	9.53589e-06
297	Labor	3	1.43038e-05
298	Levis Disease	3	1.43038e-05
299	Maculopathy	3	1.43038e-05
300	Mass, Nos	3	1.43038e-05
302	myopathy	3	1.43038e-05
303	Nephrosis	3	1.43038e-05
304	Neuroma	1	4.76794e-06
306	Pancreatitis	3	1.43038e-05
307	Post partum Heamorrhage	3	1.43038e-05
308	Pyoderma	3	1.43038e-05
309	Shigellosis	2	9.53589e-06
310	Sores, genital	3	1.43038e-05
312	Syncope	3	1.43038e-05
313	Urethral stricture	3	1.43038e-05
314	Uterine mass, Nos	3	1.43038e-05
315	Vaginal Polyps	3	1.43038e-05
316	Viral infection, Nos	3	1.43038e-05
323	Adenoma, Nos	2	9.53589e-06
327	Albinism	1	4.76794e-06
330	Arthropathy, Nos	1	4.76794e-06
336	Cryptococcal meningitis	2	9.53589e-06
337	Cystadenoma	1	4.76794e-06
340	Delayed Union	2	9.53589e-06
	Effusion	2	9.53589e-06
341	Effusion, Nos	1	4.76794e-06
443	Effusion, knee	1	4.76794e-06
342	Emesis gravidarum	2	9.53589e-06
343	Epididymitis	2	9.53589e-06
345	False labor	2	9.53589e-06
346	Fibroadenoma	2	9.53589e-06
347	Fibroma	2	9.53589e-06
	Fistula	4	1.90718e-05
348	Fistula, nos	2	9.53589e-06
452	Fistula, Rectal Vaginal	1	4.76794e-06
454	Fistula, Vesicalvaginal	1	4.76794e-06
351	Genital itching, Nos	2	9.53589e-06
352	Genital pruritus, Nos	2	9.53589e-06
353	Gynecomastia	2	9.53589e-06
354	HELP Syndrome	2	9.53589e-06
355	Hemangioma	2	9.53589e-06
356	Hematemesis	2	9.53589e-06
357	Hemolysis	1	4.76794e-06
358	Hepatocellular Carcinoma	1	4.76794e-06
359	Hiccup	2	9.53589e-06
360	Hypersplenism	2	9.53589e-06
361	Incontinence of urine	2	9.53589e-06
363	Omphalitis	2	9.53589e-06
365	Osteitis	2	9.53589e-06
366	Pain, adhesions	2	9.53589e-06
367	Phlebitis	2	9.53589e-06
368	Pleural effusion	2	9.53589e-06
372	Polydypsia	2	9.53589e-06
373	Polyps	2	9.53589e-06
374	Prostatitis	2	9.53589e-06
375	Pseudophallia	1	4.76794e-06
376	Pseudo pregnancy	2	9.53589e-06
377	Scoliosis	2	9.53589e-06
382	Toxoplasmosis	2	9.53589e-06
384	Urethral disease	1	4.76794e-06
385	Vulvitis	2	9.53589e-06
388	Addison's disease	1	4.76794e-06
391	Adenopathy, Nos	1	4.76794e-06
393	Airway Obstruction	1	4.76794e-06
396	Alveolitis	1	4.76794e-06
398	Amnionitis	1	4.76794e-06
399	Ankylosing spondylitis	1	4.76794e-06
400	Anoxia, Nos	1	4.76794e-06
401	Artherosis, Nos	1	4.76794e-06
405	Ataxis, Locomotor	1	4.76794e-06
406	Baker's cyst	1	4.76794e-06
407	Balanoprosthitis	1	4.76794e-06
408	Bartholin's gland hypertrophy,Nos	1	4.76794e-06
409	Bell's palsy	1	4.76794e-06
410	Blocked fallopian tubes	1	4.76794e-06
412	Bone deformities, Nos	1	4.76794e-06
413	Bone pain, Nos	1	4.76794e-06
414	Breast Ectopia	1	4.76794e-06
415	Bronchectasis	1	4.76794e-06
416	Bursitis, Adventitial	1	4.76794e-06
429	Club foot	1	4.76794e-06
431	Cord compression	1	4.76794e-06
434	Dactylitis	1	4.76794e-06
435	Deafness	1	4.76794e-06
436	Deformity of the knee,Nos	1	4.76794e-06
437	Delerium	1	4.76794e-06
438	Dendritis	1	4.76794e-06
439	Disorders of the central nervous system,Nos	1	4.76794e-06
441	Early labor	1	4.76794e-06
442	Echymosis, cervical	1	4.76794e-06
444	Enchephalitis	1	4.76794e-06
445	Entamoeba cyst	1	4.76794e-06
446	Epiglotitric pain	1	4.76794e-06
447	Episiotomy	1	4.76794e-06
449	Faciatis	1	4.76794e-06
458	Galactocoeles	1	4.76794e-06
459	Genital disease, Nos	1	4.76794e-06
460	heat stroke	1	4.76794e-06
464	Hepatic Coma	1	4.76794e-06
466	Herniation of the spine	1	4.76794e-06
467	Hydrophobia	1	4.76794e-06
468	Hydrosalpinx	1	4.76794e-06
469	Hyperemesis	1	4.76794e-06
470	Hyperplasia of the prostate	1	4.76794e-06
471	Hypothermia	1	4.76794e-06
472	Hypothyroidism	1	4.76794e-06
473	Impotence	1	4.76794e-06
474	Inflammatory Lupus Erythematosus	1	4.76794e-06
475	Inflammatory Oedema	1	4.76794e-06
477	Interstistial Bacterial Infection	1	4.76794e-06
479	IURD	1	4.76794e-06
480	Kal azar	1	4.76794e-06
481	Labial Adhesion	1	4.76794e-06
482	Lipoma, supraumbilical	1	4.76794e-06
483	Lower abdominal mass	1	4.76794e-06
485	Ludwig's Angina	1	4.76794e-06
486	Ludwig's Disease	1	4.76794e-06
490	Malformation of fallopian tube, Nos	1	4.76794e-06
492	Mango syndrome	1	4.76794e-06
493	Menopause	1	4.76794e-06
496	Metastasis	1	4.76794e-06
497	Multiple gestation	1	4.76794e-06
498	Muscle contracture	1	4.76794e-06
499	Myolysis	1	4.76794e-06
500	Myosis	1	4.76794e-06
501	Neck Pain	1	4.76794e-06
502	Necrosis	1	4.76794e-06
506	Neurofacial problem	1	4.76794e-06
507	Neurogenic pain	1	4.76794e-06
508	Neurological disorder	1	4.76794e-06
509	neuropathy-Bell's palsy	1	4.76794e-06
511	Noise phobia	1	4.76794e-06
512	Non-Gonococcal urethritis	1	4.76794e-06
513	Oropharyngitits	1	4.76794e-06
515	oesteoporosis,Nos	1	4.76794e-06
516	Osteofibrosis	1	4.76794e-06
517	Paraplegia	1	4.76794e-06
519	Perineal tear	1	4.76794e-06
520	Phantom limb syndrome	1	4.76794e-06
523	Polymenorrhea, acute	1	4.76794e-06
524	Premature rupture of membranes	1	4.76794e-06
526	Pseudophobia	1	4.76794e-06
527	Renal cyst	1	4.76794e-06
529	Scrotal Tear	1	4.76794e-06
530	Scurvy	1	4.76794e-06
531	Shock, psychogenic	1	4.76794e-06
532	Sore foot	1	4.76794e-06
533	Spondylosis,lumbar	1	4.76794e-06
534	Spontaneous vaginal delivery	1	4.76794e-06
535	Stenosis,Nos	1	4.76794e-06
536	Strictures,Nos	1	4.76794e-06
544	Tendinitis	1	4.76794e-06
545	Thyroid disease	1	4.76794e-06
546	Thyroiditis	1	4.76794e-06
547	Tubal Ovarian Mass	1	4.76794e-06
554	Unconscious	1	4.76794e-06
555	Uterine atony	1	4.76794e-06
556	Uterine cystocoele	1	4.76794e-06
559	Vaginal Pain, Nos	1	4.76794e-06
	Yaws	2	9.53589e-06
561	Yaws, Nos	1	4.76794e-06
562	Yaws-Crab	1	4.76794e-06
